# Supplementary material
Source: bioRxiv or medRxiv preprint supplement (https://www.biorxiv.org/highwire/filestream/2256/field_highwire_adjunct_files/11/008862-2.pdf)

Hoechst/OCT4

Hoechst/SSEA4/SOX2

Hoechst/Tra-1-81/NANOG

C3647

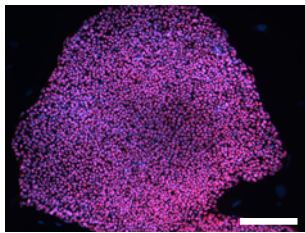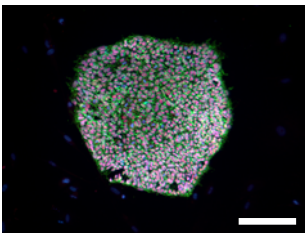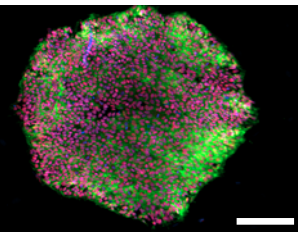

C3649

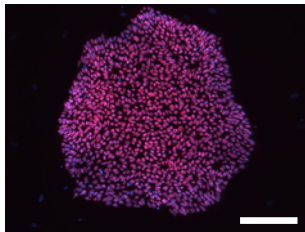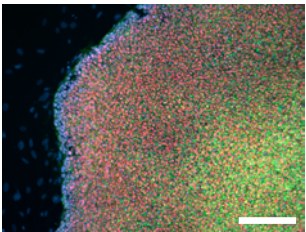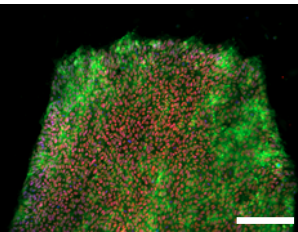

C3651

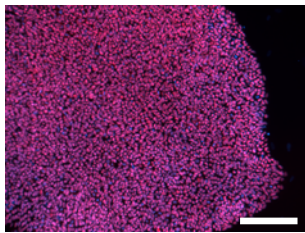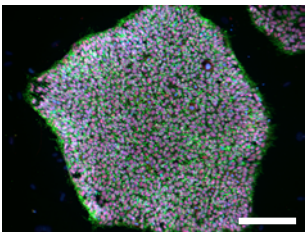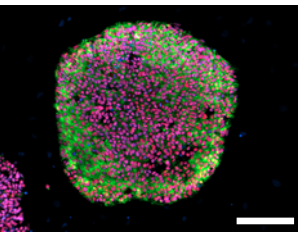

C8861

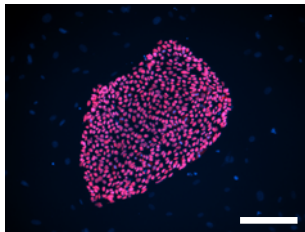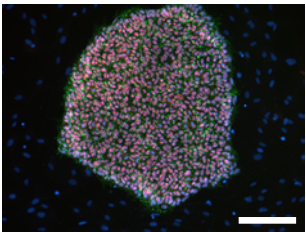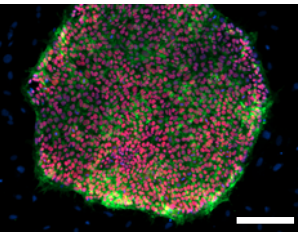

C40210

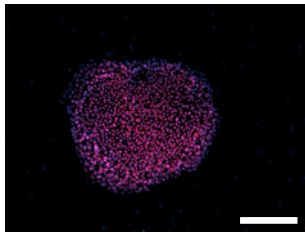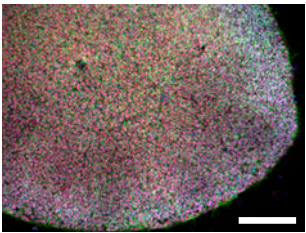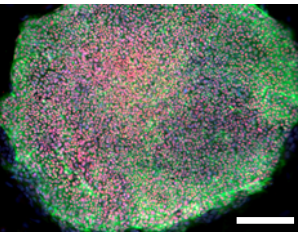

C40280

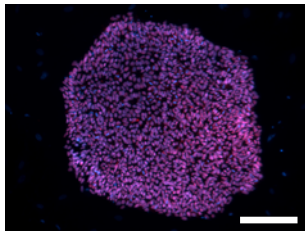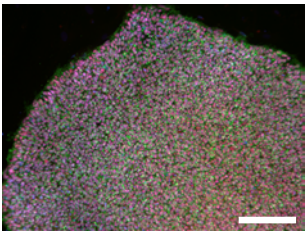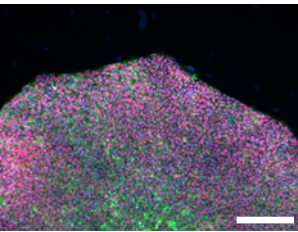

Supplement: Supplementary file [file 008862-2.pdf]
